# Supplementary material for: PICU Survivorship: Factors Affecting Feasibility and Cohort Retention in a Long-Term Outcomes Study
Source: MDPI journal article supplement (doi:10.3390/children9071041), 2022-07-13
Supplement: s1 [file s1]

# POP Admission Survey

---

How many years old is your child today?

(If your child has not yet reached his/her first birthday, enter 0).

---

Parent completing survey

- ☐ Mother  
☐ Father  
☐ Other

---

If other, please specify

---

In the following questions, we will be asking about your child's overall health and development.

---

**First, we would like to ask you about your child's health.**

---

Is there a place your child usually goes when he/she is sick or you need advice about his/her health?

- ☐ Yes  
☐ No

---

What kind of place does your child go to when he/she is sick or you need advice about his/her health?

- ☐ Doctor's office  
☐ Hospital emergency room  
☐ Hospital outpatient department  
☐ Clinic or health center  
☐ School (nurse's office, athletic trainer's office, etc.)  
☐ Friend/relative  
☐ Mexico/other locations out of US  
☐ Some other place  
☐ Does not go to one place most often  
☐ Don't know

---

Is there a place that your child usually goes when he/she needs routine preventative care, such as a physical exam or a well-child check up?

- ☐ Yes  
☐ No

---

What kind of place does your child go for routine preventative care?

- ☐ Doctor's office  
☐ Hospital emergency room  
☐ Hospital outpatient department  
☐ Clinic or health center  
☐ School (nurse's office, athletic trainer's office, etc.)  
☐ Friend/relative  
☐ Mexico/other locations out of US  
☐ Some other place  
☐ Does not go to one place most often  
☐ Don't know

---

Do you have one or more persons you think of as your child's personal doctor or nurse?

- ☐ Yes  
☐ No

---

Who is this person?

---

During the past 12 months, how many times did your child receive a well-child check-up, that is a general check-up, when he/she was not sick or injured?

---

---

During the past 12 months, how many times did your child visit a hospital emergency room?

---

---

During the past 12 months, how many times was your child admitted to the hospital (not including current admission)?

---

---

During the past 12 months, was your child admitted to the intensive care unit?

- ☐ Yes  
☐ No

---

Has your child ever seen any of the following specialists? (Check all that apply.)

- ☐ Cardiologist  
☐ Dermatologist  
☐ Developmental/Behavioral Pediatrician  
☐ Endocrinologist  
☐ Gastroenterologist  
☐ Hematologist  
☐ Hepatologist  
☐ Infectious Disease Specialist  
☐ Nephrologist  
☐ Neurologist  
☐ Neurosurgeon  
☐ Oncologist  
☐ Orthopedic Surgeon  
☐ Otolaryngologist (ENT)  
☐ Pediatric/Trauma Surgeon  
☐ Physical Medicine and Rehabilitation Physician/Physiatrist  
☐ Plastic Surgeon  
☐ Psychiatrist  
☐ Pulmonologist  
☐ Rheumatologist  
☐ Sleep Medicine Specialist  
☐ Transplant Surgeon  
☐ Other

---

If other, please specify:

---

---

When was the last time your child saw a cardiologist?

- ☐ 0-1 month ago  
☐ 2-3 months ago  
☐ 4-6 months ago  
☐ 7-9 months ago  
☐ 10-12 months ago  
☐ Longer than 12 months ago

---

When was the last time your child saw a dermatologist?

- ☐ 0-1 month ago  
☐ 2-3 months ago  
☐ 4-6 months ago  
☐ 7-9 months ago  
☐ 10-12 months ago  
☐ Longer than 12 months ago

---

When was the last time your child saw a developmental/behavioral pediatrician?

☐ 0-1 month ago  
☐ 2-3 months ago  
☐ 4-6 months ago  
☐ 7-9 months ago  
☐ 10-12 months ago  
☐ Longer than 12 months ago

---

When was the last time that your child saw an endocrinologist?

☐ 0-1 month ago  
☐ 2-3 months ago  
☐ 4-6 months ago  
☐ 7-9 months ago  
☐ 10-12 months ago  
☐ Longer than 12 months ago

---

When was the last time your child saw a gastroenterologist?

☐ 0-1 month ago  
☐ 2-3 months ago  
☐ 4-6 months ago  
☐ 7-9 months ago  
☐ 10-12 months ago  
☐ Longer than 12 months ago

---

When was the last time your child saw a hematologist?

☐ 0-1 month ago  
☐ 2-3 months ago  
☐ 4-6 months ago  
☐ 7-9 months ago  
☐ 10-12 months ago  
☐ Longer than 12 months ago

---

When was the last time your child saw a hepatologist?

☐ 0-1 month ago  
☐ 2-3 months ago  
☐ 4-6 months ago  
☐ 7-9 months ago  
☐ 10-12 months ago  
☐ Longer than 12 months ago

---

When was the last time your child saw an infectious disease specialist?

☐ 0-1 month ago  
☐ 2-3 months ago  
☐ 4-6 months ago  
☐ 7-9 months ago  
☐ 10-12 months ago  
☐ Longer than 12 months ago

---

When was the last time your child saw a nephrologist?

☐ 0-1 month ago  
☐ 2-3 months ago  
☐ 4-6 months ago  
☐ 7-9 months ago  
☐ 10-12 months ago  
☐ Longer than 12 months ago

---

When was the last time your child saw a neurologist?

☐ 0-1 month ago  
☐ 2-3 months ago  
☐ 4-6 months ago  
☐ 7-9 months ago  
☐ 10-12 months ago  
☐ Longer than 12 months ago

---

---

When was the last time your child saw a neurosurgeon?

- ☐ 0-1 month ago
- ☐ 2-3 months ago
- ☐ 4-6 months ago
- ☐ 7-9 months ago
- ☐ 10-12 months ago
- ☐ Longer than 12 months ago

---

When was the last time your child saw an oncologist?

- ☐ 0-1 month ago
- ☐ 2-3 months ago
- ☐ 4-6 months ago
- ☐ 7-9 months ago
- ☐ 10-12 months ago
- ☐ Longer than 12 months ago

---

When was the last time your child saw an  
otolaryngologist?

- ☐ 0-1 month ago
- ☐ 2-3 months ago
- ☐ 4-6 months ago
- ☐ 7-9 months ago
- ☐ 10-12 months ago
- ☐ Longer than 12 months ago

---

When was the last time your child saw a  
pediatric/trauma surgeon?

- ☐ 0-1 month ago
- ☐ 2-3 months ago
- ☐ 4-6 months ago
- ☐ 7-9 months ago
- ☐ 10-12 months ago
- ☐ Longer than 12 months ago

---

When was the last time your child saw a physical  
medicine and rehabilitation physician?

- ☐ 0-1 month ago
- ☐ 2-3 months ago
- ☐ 4-6 months ago
- ☐ 7-9 months ago
- ☐ 10-12 months ago
- ☐ Longer than 12 months ago

---

When was the last time your child saw a psychiatrist?

- ☐ 0-1 month ago
- ☐ 2-3 months ago
- ☐ 4-6 months ago
- ☐ 7-9 months ago
- ☐ 10-12 months ago
- ☐ Longer than 12 months ago

---

When was the last time your child saw a pulmonologist?

- ☐ 0-1 month ago
- ☐ 2-3 months ago
- ☐ 4-6 months ago
- ☐ 7-9 months ago
- ☐ 10-12 months ago
- ☐ Longer than 12 months ago

---

When was the last time your child saw a  
rheumatologist?

- ☐ 0-1 month ago
- ☐ 2-3 months ago
- ☐ 4-6 months ago
- ☐ 7-9 months ago
- ☐ 10-12 months ago
- ☐ Longer than 12 months ago

---

When was the last time your child saw a sleep medicine specialist?

- ☐ 0-1 month ago  
☐ 2-3 months ago  
☐ 4-6 months ago  
☐ 7-9 months ago  
☐ 10-12 months ago  
☐ Longer than 12 months ago

---

When was the last time your child saw an orthopedic surgeon?

- ☐ 0-1 month ago  
☐ 2-3 months ago  
☐ 4-6 months ago  
☐ 7-9 months ago  
☐ 10-12 months ago  
☐ Longer than 12 months ago

---

When was the last time your child saw a plastic surgeon?

- ☐ 0-1 month ago  
☐ 2-3 months ago  
☐ 4-6 months ago  
☐ 7-9 months ago  
☐ 10-12 months ago  
☐ Longer than 12 months ago

---

When was the last time your child saw a transplant surgeon?

- ☐ 0-1 month ago  
☐ 2-3 months ago  
☐ 4-6 months ago  
☐ 7-9 months ago  
☐ 10-12 months ago  
☐ Longer than 12 months ago

---

If "other" was marked, when was the last time your child saw this other physician?

- ☐ 0-1 month ago  
☐ 2-3 months ago  
☐ 4-6 months ago  
☐ 7-9 months ago  
☐ 10-12 months ago  
☐ Longer than 12 months ago

---

Has your child ever received any of the following therapies? (Check all that apply.)

- ☐ Behavioral therapy  
☐ Feeding therapy  
☐ Occupational therapy  
☐ Physical therapy  
☐ Speech therapy  
☐ Talk therapy (with a social worker, psychologist, or psychiatrist)  
☐ Other

---

If other, please specify:

---

---

When was the last time your child received behavioral therapy?

- ☐ 0-1 month ago  
☐ 2-3 months ago  
☐ 4-6 months ago  
☐ 7-9 months ago  
☐ 10-12 months ago  
☐ Longer than 12 months ago

---

When was the last time your child received feeding therapy?

- ☐ 0-1 month ago  
☐ 2-3 months ago  
☐ 4-6 months ago  
☐ 7-9 months ago  
☐ 10-12 months ago  
☐ Longer than 12 months ago

---

When was the last time your child received occupational therapy?

- ☐ 0-1 month ago  
☐ 2-3 months ago  
☐ 4-6 months ago  
☐ 7-9 months ago  
☐ 10-12 months ago  
☐ Longer than 12 months ago

---

When was the last time your child received physical therapy?

- ☐ 0-1 month ago  
☐ 2-3 months ago  
☐ 4-6 months ago  
☐ 7-9 months ago  
☐ 10-12 months ago  
☐ Longer than 12 months ago

---

When was the last time your child received speech therapy?

- ☐ 0-1 month ago  
☐ 2-3 months ago  
☐ 4-6 months ago  
☐ 7-9 months ago  
☐ 10-12 months ago  
☐ Longer than 12 months ago

---

When was the last time your child received talk therapy?

- ☐ 0-1 month ago  
☐ 2-3 months ago  
☐ 4-6 months ago  
☐ 7-9 months ago  
☐ 10-12 months ago  
☐ Longer than 12 months ago

---

Does your child receive home nursing care?

- ☐ Yes  
☐ No

---

How many hours/week does your child receive home nursing care?

---

---

Has a doctor or other health care provider ever told you that your child has any of the following conditions?

- ☐ Anxiety problems  
☐ Attention Deficit Disorder or Attention Deficit Hyperactive Disorder (ADD or ADHD)  
☐ Autism or other autism spectrum disorder  
☐ Behavioral or conduct problems  
☐ Depression  
☐ Developmental delay  
☐ Epilepsy or seizure disorder  
☐ Intellectual disability or mental retardation  
☐ Learning disorder  
☐ Other

---

If other, please specify:

---

---

Does your child take medications for behavior, attention, or mood problems?

- ☐ Yes  
☐ No

---

Which medications?

---

**Next, we will ask questions about how your child is doing at school.**

Does your child attend school outside of your home?

- ☐ Yes  
☐ No

What grade is your child in school?

- ☐ Kindergarten  
☐ 1st Grade  
☐ 2nd Grade  
☐ 3rd Grade  
☐ 4th Grade  
☐ 5th Grade  
☐ 6th Grade  
☐ 7th Grade  
☐ 8th Grade  
☐ 9th Grade  
☐ Other

If other, please specify:

\_\_\_\_\_

Is your child in a Special Education Program?

- ☐ Yes  
☐ No

Does your child have an IEP (Individualized Educational Program)?

- ☐ Yes  
☐ No

What services and accommodations does your child receive in his/her IEP? (Choose all that apply.)

- ☐ Extended school year  
☐ Feeding Therapy  
☐ Occupational Therapy  
☐ One-on-one aide  
☐ Physical Therapy  
☐ Social Skills Group  
☐ Social Work  
☐ Speech Therapy  
☐ Other

Was your child in Early Intervention (before the age of 3 years)?

- ☐ Yes  
☐ No

What services did your child receive through Early Intervention? (Check all that apply.)

- ☐ Developmental Therapy  
☐ Feeding Therapy  
☐ Nutritional Therapy  
☐ Occupational Therapy  
☐ Physical Therapy  
☐ Social Work  
☐ Speech Therapy  
☐ Other

If other, please specify:

\_\_\_\_\_

Over the past 12 months, how many school days did your child miss because of illness or injury?

\_\_\_\_\_

**Next, we will ask you about additional impacts that your child's health may have had.**

How many other children live in your household?

---

In the past 12 months, on average, how many school days did each of these children miss due to your child's illness?

Child 1

---

Child 2

---

Child 3

---

Child 4

---

Child 5

---

Child 6

---

Child 7

---

Has your child's health conditions caused financial problems for your family?

☐ Yes  
☐ No

Have you or other family members stopped working because of your child's health conditions?

☐ Yes  
☐ No

Have you or other family members cut down on the hours you work because of your child's health?

☐ Yes  
☐ No
